# Supplementary material for: Porosity-dependent photoelectrochemical activity of double-layered TiO2 thin films deposited by spin-coating method
Source: Royal Society of Chemistry journal article supplement (doi:10.1039/d3ra06914a), 2023-01-01
Supplement: d3ra06914a1.pdf [file d3ra06914a1.pdf]

## Porosity-dependent photoelectrochemical activity of double-layered TiO<sub>2</sub> thin films deposited by spin-coating method

Kuralay Rustembekkyzy<sup>1</sup>, Amir Zholdasbekov<sup>1</sup>, Alshyn Abduvalov<sup>2</sup>, Marat Kaikanov<sup>2</sup>, Timur Sh. Atabaev<sup>1,\*</sup>

<sup>1</sup> Department of Chemistry, Nazarbayev University, Astana 010000, Kazakhstan

<sup>2</sup> Department of Physics, Nazarbayev University, Astana 010000, Kazakhstan

Corresponding author: Timur Sh. Atabaev ([timur.atabaev@nu.edu.kz](mailto:timur.atabaev@nu.edu.kz)), Tel: +7-7172-70-60-26

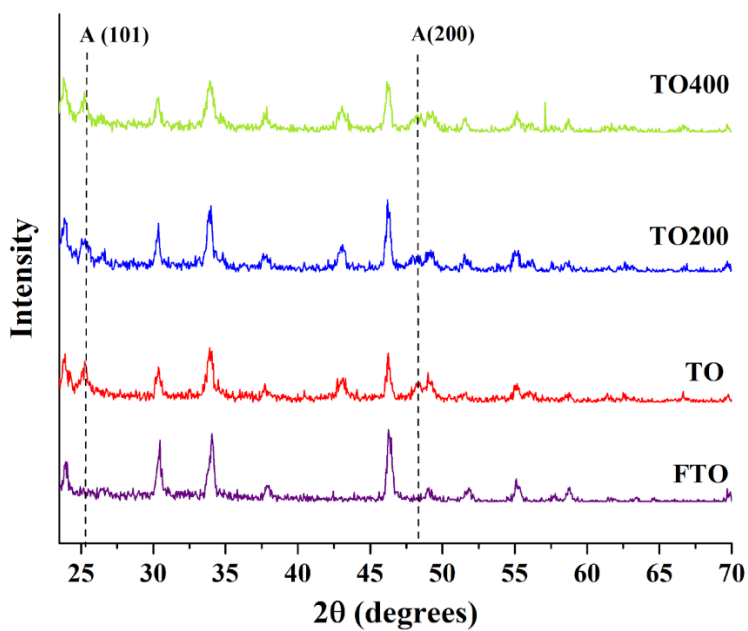

**Figure S1.** XRD patterns of prepared films and FTO for comparison

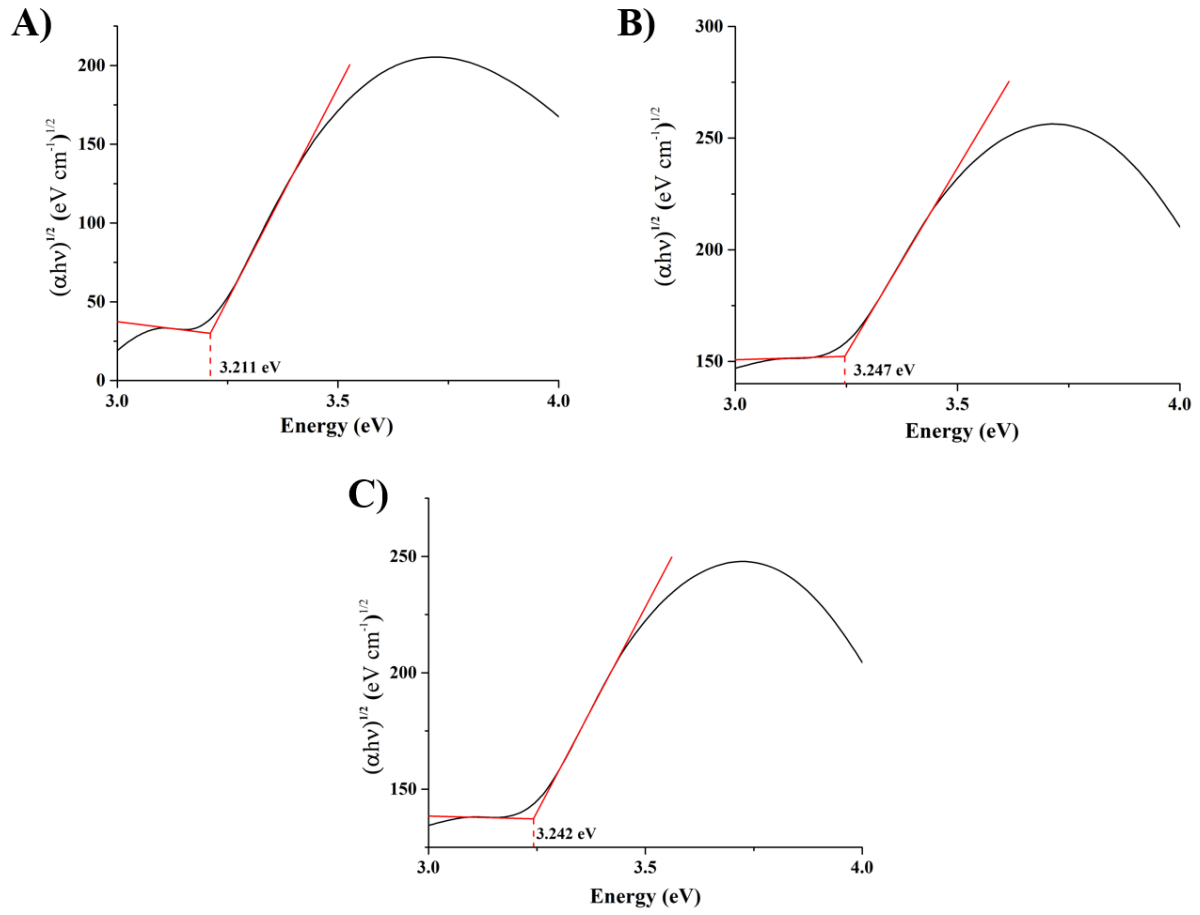

**Figure S2.** Tauc plots and calculated bandgaps of TO (A), TO200 (B), and TO400 (C) films.
